# Supplementary material
Source: publisher figshare collection journal article supplement (https://sage.figshare.com/ndownloader/files/14375876)
Supplement: Supplementary file 1 [file 14375876]

**Online Appendix**

**Peacekeeping Effectiveness and Blue Helmets’ Distance from Locals**

**Vincenzo Bove and Andrea Ruggeri**

In this appendix, we report a variety of additional model specifications to increase the confidence in our arguments and to show that the findings do not depend on specific decisions in the research design.

**Table A1: Distance with Locals and One-sided Violence - fixed effects negative binomial, no DRC and Rwanda**

|  | i | ii | iii | iv | v | vi | vii | viii | ix |
| --- | --- | --- | --- | --- | --- | --- | --- | --- | --- |
| Civilian Casualties | |  |  |  |  |  |  |  |  |
| All OSV (t-1) | 0.698*** | 0.707*** | 0.714*** | 0.568*** | 0.545*** | 0.687*** | 0.705*** | 0.550*** | 0.527*** |
|  | (0.165) | (0.164) | (0.167) | (0.181) | (0.176) | (0.167) | (0.169) | (0.184) | (0.177) |
| UN Troops (t-1) | 0.010 | 0.016 | 0.041*** | -0.020 | 0.041** | 0.019 | 0.046*** | -0.020 | 0.045*** |
|  | (0.013) | (0.014) | (0.014) | (0.016) | (0.017) | (0.014) | (0.014) | (0.016) | (0.017) |
| UN Police (t-1) | 0.289*** | 0.251*** | 0.198*** | 0.364*** | 0.224*** | 0.191*** | 0.136* | 0.357*** | 0.235*** |
|  | (0.064) | (0.070) | (0.070) | (0.068) | (0.071) | (0.071) | (0.071) | (0.069) | (0.071) |
| UN Observers (t-1) | 0.451 | 0.189 | 0.095 | 1.495*** | -0.267 | 0.032 | -0.072 | 1.578*** | -0.212 |
|  | (0.397) | (0.410) | (0.422) | (0.409) | (0.476) | (0.415) | (0.424) | (0.416) | (0.484) |
| Number Donor Countries | -0.055*** | -0.048*** | -0.048*** | -0.050*** | -0.049*** | -0.055*** | -0.055*** | -0.055*** | -0.048*** |
|  | (0.006) | (0.006) | (0.006) | (0.006) | (0.007) | (0.007) | (0.006) | (0.007) | (0.007) |
| Population | 0.000*** | 0.000*** | 0.000*** | 0.000*** | 0.000*** | 0.000*** | 0.000*** | 0.000*** | 0.000*** |
|  | (0.000) | (0.000) | (0.000) | (0.000) | (0.000) | (0.000) | (0.000) | (0.000) | (0.000) |
| t | -0.045*** | -0.042*** | -0.035*** | -0.045*** | -0.062*** | -0.039*** | -0.033*** | -0.042*** | -0.062*** |
|  | (0.005) | (0.006) | (0.006) | (0.006) | (0.006) | (0.006) | (0.006) | (0.006) | (0.006) |
| t2 | 0.000*** | 0.000*** | 0.000*** | 0.000*** | 0.000*** | 0.000*** | 0.000*** | 0.000*** | 0.000*** |
|  | (0.000) | (0.000) | (0.000) | (0.000) | (0.000) | (0.000) | (0.000) | (0.000) | (0.000) |
| t3 | -0.000*** | -0.000*** | -0.000* | -0.000 | -0.000*** | -0.000** | -0.000 | -0.000 | -0.000*** |
|  | (0.000) | (0.000) | (0.000) | (0.000) | (0.000) | (0.000) | (0.000) | (0.000) | (0.000) |
| Contiguity (t-1) | 2.005** |  |  |  |  | 4.903*** | 4.161*** | 1.486 | -2.140 |
|  | (0.892) |  |  |  |  | (1.179) | (1.012) | (1.042) | (1.438) |
| Linguistic D. (t-1) |  | 6.836*** |  |  |  | 8.682*** |  |  |  |
|  |  | (2.229) |  |  |  | (2.418) |  |  |  |
| Religious D. (t-1) |  |  | 6.246*** |  |  |  | 6.567*** |  |  |
|  |  |  | (0.878) |  |  |  | (0.898) |  |  |
| Polity D.(t-1) |  |  |  | -0.921*** |  |  |  | -0.906*** |  |
|  |  |  |  | (0.312) |  |  |  | (0.327) |  |
| GDP D. (t-1) |  |  |  |  | -6.316*** |  |  |  | -6.994*** |
|  |  |  |  |  | (1.473) |  |  |  | (1.573) |
| Observations | 1594 | 1577 | 1577 | 1384 | 1358 | 1571 | 1571 | 1369 | 1349 |

Panel with Fixed Effects. Robust standard errors are given in parentheses clustered by country. *p < 0.10, ** p < 0.05, *** p < 0.01.

**Table A2: Distance with Locals and One-sided Violence - negative binomial**

|  | i | ii | iii | iv | v | vi | vii | viii | ix |
| --- | --- | --- | --- | --- | --- | --- | --- | --- | --- |
| Civilian Casualties |  |  |  |  |  |  |  |  |  |
| All OSV (t-1) | 0.016* | 0.017* | 0.014* | 0.014* | 0.013** | 0.017* | 0.014* | 0.014* | 0.013** |
|  | (0.009) | (0.010) | (0.008) | (0.008) | (0.006) | (0.010) | (0.008) | (0.008) | (0.006) |
| UN Troops (t-1) | -0.177*** | -0.190*** | -0.115** | -0.164*** | -0.121** | -0.189*** | -0.115** | -0.162*** | -0.129** |
|  | (0.038) | (0.041) | (0.048) | (0.041) | (0.053) | (0.041) | (0.048) | (0.042) | (0.054) |
| UN Police (t-1) | -0.102 | 0.114 | 0.230 | 0.008 | -0.212 | 0.078 | 0.279 | -0.048 | -0.196 |
|  | (0.427) | (0.251) | (0.203) | (0.258) | (0.274) | (0.305) | (0.279) | (0.364) | (0.430) |
| UN Observers (t-1) | 9.681*** | 9.443*** | 6.100* | 9.510*** | 7.651** | 9.475*** | 6.046* | 9.691*** | 8.010** |
|  | (2.953) | (2.863) | (3.173) | (2.720) | (3.153) | (2.893) | (3.128) | (2.866) | (3.334) |
| Number Donor Countries | -0.042* | -0.041* | -0.045** | -0.046* | -0.038 | -0.041* | -0.045** | -0.051** | -0.039 |
|  | (0.024) | (0.024) | (0.022) | (0.024) | (0.026) | (0.024) | (0.022) | (0.025) | (0.027) |
| Population | 0.000 | 0.000 | 0.000 | 0.000 | 0.000 | 0.000 | 0.000 | 0.000 | 0.000 |
|  | (0.000) | (0.000) | (0.000) | (0.000) | (0.000) | (0.000) | (0.000) | (0.000) | (0.000) |
| t | -0.087** | -0.101** | -0.074** | -0.086*** | -0.101** | -0.101** | -0.074** | -0.081** | -0.098** |
|  | (0.041) | (0.040) | (0.033) | (0.032) | (0.045) | (0.041) | (0.033) | (0.035) | (0.048) |
| t2 | 0.001 | 0.001* | 0.000 | 0.000* | 0.001 | 0.001* | 0.000 | 0.000 | 0.001 |
|  | (0.000) | (0.000) | (0.000) | (0.000) | (0.000) | (0.000) | (0.000) | (0.000) | (0.000) |
| t3 | -0.000 | -0.000 | -0.000 | -0.000 | -0.000 | -0.000 | -0.000 | -0.000 | -0.000 |
|  | (0.000) | (0.000) | (0.000) | (0.000) | (0.000) | (0.000) | (0.000) | (0.000) | (0.000) |
| Contiguity (t-1) | 2.176 |  |  |  |  | 0.898 | -1.283 | 1.250 | 0.165 |
|  | (4.492) |  |  |  |  | (2.473) | (2.722) | (3.514) | (5.285) |
| Linguistic D. (t-1) |  | 9.873*** |  |  |  | 9.814*** |  |  |  |
|  |  | (2.721) |  |  |  | (2.689) |  |  |  |
| Religious D. (t-1) |  |  | 10.621*** |  |  |  | 10.718*** |  |  |
|  |  |  | (2.482) |  |  |  | (2.550) |  |  |
| Polity D.(t-1) |  |  |  | -1.259 |  |  |  | -1.689 |  |
|  |  |  |  | (2.334) |  |  |  | (2.221) |  |
| GDP D. (t-1) |  |  |  |  | -22.167*** |  |  |  | -20.726*** |
|  |  |  |  |  | (4.960) |  |  |  | (4.722) |
| Observations | 2052 | 1996 | 1996 | 1846 | 1863 | 1990 | 1990 | 1788 | 1805 |

Pooled estimation. Robust standard errors are given in parentheses clustered by country. *p < 0.10, ** p < 0.05, *** p < 0.01.

**Table A3: Distance with Locals and Battle-deaths - fixed effects negative binomial, no DRC and Rwanda**

|  | i | ii | iii | iv | v | vi | vii | viii | ix |
| --- | --- | --- | --- | --- | --- | --- | --- | --- | --- |
| Battle Deaths |  |  |  |  |  |  |  |  |  |
| All Battle Deaths (t-1) | 0.186*** | 0.225*** | 0.173*** | 0.308*** | 0.239*** | 0.233*** | 0.180*** | 0.318*** | 0.234*** |
|  | (0.051) | (0.049) | (0.049) | (0.060) | (0.056) | (0.050) | (0.050) | (0.061) | (0.056) |
| UN Troops (t-1) | 0.021** | 0.023** | 0.045*** | 0.000 | 0.045*** | 0.023** | 0.049*** | 0.001 | 0.043*** |
|  | (0.009) | (0.009) | (0.010) | (0.011) | (0.012) | (0.010) | (0.010) | (0.011) | (0.012) |
| UN Police (t-1) | 0.146*** | 0.181*** | 0.134** | 0.272*** | 0.119** | 0.118* | 0.056 | 0.258*** | 0.101* |
|  | (0.054) | (0.059) | (0.057) | (0.055) | (0.058) | (0.061) | (0.059) | (0.056) | (0.059) |
| UN Observers (t-1) | -0.156 | -0.489 | -0.631* | 0.925*** | -0.716* | -0.414 | -0.683** | 0.974*** | -0.645 |
|  | (0.327) | (0.336) | (0.341) | (0.320) | (0.400) | (0.345) | (0.341) | (0.327) | (0.403) |
| Number Donor Countries | -0.047*** | -0.042*** | -0.041*** | -0.040*** | -0.042*** | -0.048*** | -0.046*** | -0.047*** | -0.045*** |
|  | (0.005) | (0.005) | (0.004) | (0.005) | (0.005) | (0.005) | (0.005) | (0.005) | (0.005) |
| Population | 0.000*** | 0.000*** | 0.000*** | 0.000*** | 0.000*** | 0.000*** | 0.000*** | 0.000*** | 0.000*** |
|  | (0.000) | (0.000) | (0.000) | (0.000) | (0.000) | (0.000) | (0.000) | (0.000) | (0.000) |
| t | -0.026*** | -0.026*** | -0.020*** | -0.040*** | -0.037*** | -0.022*** | -0.017*** | -0.038*** | -0.034*** |
|  | (0.004) | (0.004) | (0.004) | (0.005) | (0.005) | (0.004) | (0.004) | (0.005) | (0.005) |
| t2 | 0.000* | 0.000 | 0.000 | 0.000*** | 0.000*** | 0.000 | -0.000 | 0.000*** | 0.000*** |
|  | (0.000) | (0.000) | (0.000) | (0.000) | (0.000) | (0.000) | (0.000) | (0.000) | (0.000) |
| t3 | 0.000 | 0.000 | 0.000** | 0.000 | -0.000 | 0.000 | 0.000** | 0.000 | 0.000 |
|  | (0.000) | (0.000) | (0.000) | (0.000) | (0.000) | (0.000) | (0.000) | (0.000) | (0.000) |
| Contiguity (t-1) | 2.801*** |  |  |  |  | 4.190*** | 4.209*** | 3.001*** | 1.699* |
|  | (0.658) |  |  |  |  | (0.747) | (0.706) | (0.728) | (0.892) |
| Linguistic D. (t-1) |  | 7.474*** |  |  |  | 9.039*** |  |  |  |
|  |  | (1.470) |  |  |  | (1.669) |  |  |  |
| Religious D. (t-1) |  |  | 5.303*** |  |  |  | 5.785*** |  |  |
|  |  |  | (0.615) |  |  |  | (0.636) |  |  |
| Polity D.(t-1) |  |  |  | 0.272 |  |  |  | 0.494** |  |
|  |  |  |  | (0.236) |  |  |  | (0.251) |  |
| GDP D. (t-1) |  |  |  |  | -0.563 |  |  |  | 0.192 |
|  |  |  |  |  | (0.900) |  |  |  | (0.963) |
| Observations | 1725 | 1708 | 1708 | 1515 | 1472 | 1702 | 1702 | 1500 | 1463 |

Panel with Fixed Effects. Robust standard errors are given in parentheses clustered by country. *p < 0.10, ** p < 0.05, *** p < 0.01.

**Table A4: Distance with Locals and Battle-deaths - negative binomial**

|  | i | ii | iii | iv | v | vi | vii | viii | ix |
| --- | --- | --- | --- | --- | --- | --- | --- | --- | --- |
| Battle Deaths |  |  |  |  |  |  |  |  |  |
| All Battle Deaths (t-1) | 0.024 | 0.026 | 0.018 | 0.019 | 0.021 | 0.026 | 0.018 | 0.018 | 0.020 |
|  | (0.037) | (0.052) | (0.018) | (0.017) | (0.028) | (0.054) | (0.019) | (0.015) | (0.024) |
| UN Troops (t-1) | -0.091*** | -0.102*** | -0.041 | -0.099*** | -0.093 | -0.096*** | -0.041 | -0.087*** | -0.112* |
|  | (0.035) | (0.036) | (0.041) | (0.033) | (0.060) | (0.037) | (0.041) | (0.033) | (0.059) |
| UN Police (t-1) | -0.232 | 0.138 | 0.182 | 0.140 | -0.112 | -0.054 | 0.047 | -0.102 | -0.284 |
|  | (0.533) | (0.323) | (0.263) | (0.294) | (0.413) | (0.430) | (0.354) | (0.424) | (0.657) |
| UN Observers (t-1) | 7.089*** | 6.419*** | 3.718 | 7.071*** | 7.034** | 6.562** | 4.039 | 7.526*** | 8.405** |
|  | (2.661) | (2.421) | (2.285) | (2.356) | (3.339) | (2.623) | (2.485) | (2.593) | (3.697) |
| Number Donor Countries | -0.077*** | -0.080*** | -0.074*** | -0.065*** | -0.051** | -0.083*** | -0.077*** | -0.076*** | -0.060** |
|  | (0.021) | (0.020) | (0.018) | (0.023) | (0.023) | (0.022) | (0.019) | (0.025) | (0.025) |
| Population | 0.000 | 0.000 | 0.000 | 0.000 | 0.000 | 0.000 | 0.000 | 0.000 | 0.000 |
|  | (0.000) | (0.000) | (0.000) | (0.000) | (0.000) | (0.000) | (0.000) | (0.000) | (0.000) |
| t | -0.067* | -0.071** | -0.057** | -0.070** | -0.093** | -0.072** | -0.056** | -0.063** | -0.079* |
|  | (0.035) | (0.034) | (0.025) | (0.028) | (0.039) | (0.035) | (0.026) | (0.031) | (0.046) |
| t2 | 0.000 | 0.000 | 0.000 | 0.000 | 0.001 | 0.000 | 0.000 | 0.000 | 0.001 |
|  | (0.000) | (0.000) | (0.000) | (0.000) | (0.000) | (0.000) | (0.000) | (0.000) | (0.001) |
| t3 | -0.000 | -0.000 | -0.000 | -0.000 | -0.000 | -0.000 | -0.000 | -0.000 | -0.000 |
|  | (0.000) | (0.000) | (0.000) | (0.000) | (0.000) | (0.000) | (0.000) | (0.000) | (0.000) |
| Contiguity (t-1) | 6.583 |  |  |  |  | 4.893 | 3.510 | 5.388 | 5.953 |
|  | (7.070) |  |  |  |  | (4.487) | (3.627) | (4.389) | (10.943) |
| Linguistic D. (t-1) |  | 7.118*** |  |  |  | 6.786** |  |  |  |
|  |  | (2.514) |  |  |  | (2.791) |  |  |  |
| Religious D. (t-1) |  |  | 8.984*** |  |  |  | 8.613*** |  |  |
|  |  |  | (1.802) |  |  |  | (1.973) |  |  |
| Polity D.(t-1) |  |  |  | 1.331 |  |  |  | 0.469 |  |
|  |  |  |  | (2.073) |  |  |  | (1.806) |  |
| GDP D. (t-1) |  |  |  |  | -7.996 |  |  |  | -4.999 |
|  |  |  |  |  | (5.996) |  |  |  | (5.143) |
| Observations | 2052 | 1996 | 1996 | 1846 | 1863 | 1990 | 1990 | 1788 | 1805 |

Pooled estimation. Robust standard errors are given in parentheses clustered by country.*p < 0.10, ** p < 0.05, *** p < 0.01.

**Table A5: Conflict characteristics and distance with locals - fixed effects OLS**

|  | Contiguity | Linguistic | Religious | Polity | GDP | Contiguity | Linguistic | Religious | Polity | GDP |
| --- | --- | --- | --- | --- | --- | --- | --- | --- | --- | --- |
| UN Troops (t-1) | -0.042 | -0.019 | -0.016 | 0.076 | 0.097 | -0.042 | -0.019 | -0.016 | 0.076 | 0.097 |
|  | (0.050) | (0.081) | (0.193) | (0.260) | (0.076) | (0.050) | (0.081) | (0.192) | (0.260) | (0.076) |
| UN Police (t-1) | -0.110 | -0.270 | -0.758 | 2.948 | -0.279 | -0.110 | -0.270 | -0.758 | 2.949 | -0.279 |
|  | (0.614) | (0.353) | (0.769) | (3.650) | (0.375) | (0.614) | (0.353) | (0.769) | (3.649) | (0.375) |
| UN Observers (t-1) | 3.523** | 1.530 | -8.330 | 3.063 | -1.569 | 3.524** | 1.527 | -8.331 | 3.038 | -1.569 |
|  | (1.303) | (3.165) | (7.550) | (11.917) | (4.176) | (1.304) | (3.167) | (7.550) | (11.910) | (4.178) |
| Number Donor Countries | 0.053* | -0.068 | -0.053 | 0.033 | 0.082** | 0.053* | -0.068 | -0.053 | 0.033 | 0.082** |
|  | (0.027) | (0.046) | (0.096) | (0.166) | (0.034) | (0.027) | (0.046) | (0.096) | (0.166) | (0.034) |
| Population | 0.000 | 0.000 | 0.001* | -0.002 | -0.000 | 0.000 | 0.000 | 0.001* | -0.002 | -0.000 |
|  | (0.000) | (0.000) | (0.000) | (0.001) | (0.000) | (0.000) | (0.000) | (0.000) | (0.001) | (0.000) |
| All OSV (t-1) | 0.001 | -0.007 | -0.006 | -0.039*** | 0.000 |  |  |  |  |  |
|  | (0.002) | (0.007) | (0.007) | (0.014) | (0.007) |  |  |  |  |  |
| All Battle Deaths (t-1) |  |  |  |  |  | 0.001 | -0.007 | -0.005 | -0.044*** | 0.000 |
|  |  |  |  |  |  | (0.002) | (0.007) | (0.006) | (0.015) | (0.007) |
| Observations | 2053 | 1997 | 1997 | 1848 | 1866 | 2053 | 1997 | 1997 | 1848 | 1866 |

Distances multiplied by 100 to facilitate interpretation.

Two-way fixed-effect models. Robust standard errors are given in parentheses clustered by country

*p < 0.10, ** p < 0.05, *** p < 0.01.
